# Supplementary material
Source: Research Square preprint supplement (doi:10.21203/rs.3.rs-9629847/v1)
Supplement: Supplementary file 1 [file 4f5af8662d0d889b9ba0d38b.pdf]

## Supplementary Materials for

### AI-designed AAV capsids deliver high-efficiency muscle gene transfer for low-dose therapy

Eva Petat *et al.*

Corresponding authors: Isabelle Richard, [richard@genethon.fr](mailto:richard@genethon.fr), Ai Vu Hong, [avuhong@genethon.fr](mailto:avuhong@genethon.fr)

#### The PDF file includes:

Supplementary Figure 1 to Supplementary Figure 7

Table S1

## Supplementary Figures

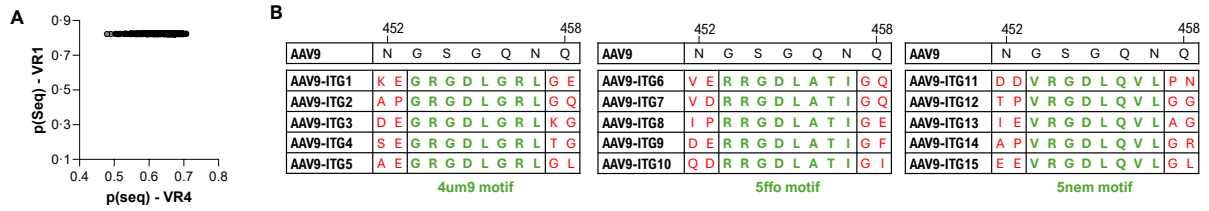

**Supplementary Figure 1: Computational design of AAV9 capsids targeting  $\alpha$ V $\beta$ 6 integrin. A.** Comparison of mean residue probabilities within VR1 and VR4 across all Rosetta-generated sequences. Optimization is restricted to VR4, consistent with the design strategy, while VR1 remains largely unchanged. **B.** Amino acid sequences of the VR4 loop for the 5 top capsid variants selected for each  $\alpha$ V $\beta$ 6-binding motif and subjected to experimental validation.

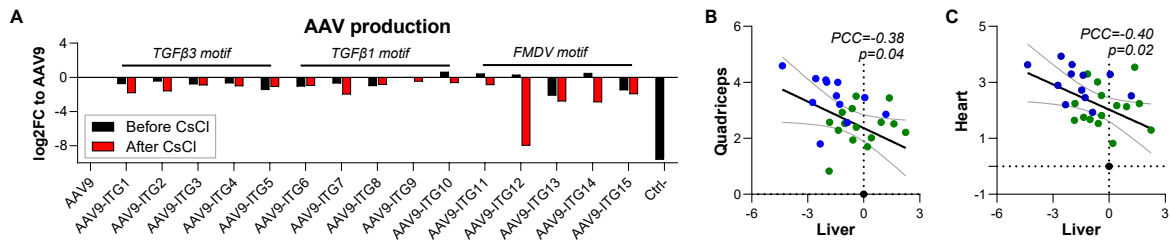

**Supplementary Figure 2: Comparison of transduction efficiencies of designed AAV9 variants.** **A.** Vector production yields of individual capsid variants in the barcoded library before and after CsCl-based purification. Negative control (Ctrl-): AAV9 capsid containing three premature stop codons in the cap ORF, abolishing expression of VP1, VP2 and VP3. **B-C.** Scatter plots showing the inverse correlation between transduction efficiency in liver and quadriiceps muscle (**B**) or liver and heart (**C**) for AAV9-ITG1–9 capsid variants. PCC: Pearson correlation coefficient. Data are presented as log<sub>2</sub> fold-change (log<sub>2</sub>FC) relative to AAV9. Correlation analysis in **B-C** was performed using Pearson’s method.

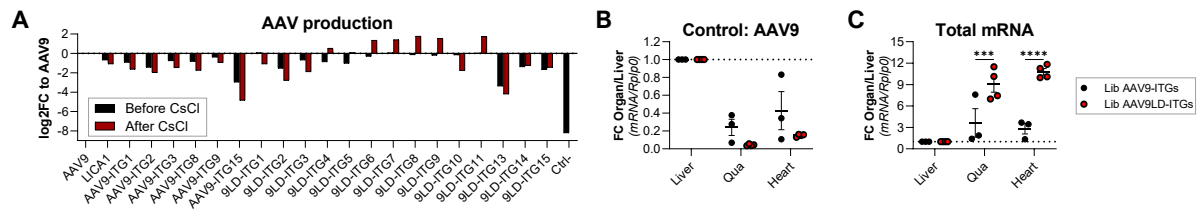

**Supplementary Figure 3: Barcoded library design reshapes tissue distribution toward skeletal and cardiac muscle.** **A.** Vector production yields of individual capsid variants in the barcoded library before and after CsCl-based purification. Negative control (Ctrl-): AAV9 capsid containing three premature stop codons in the cap ORF, abolishing expression of VP1, VP2 and VP3. **B-C.** Comparison of transgene mRNA levels in liver, skeletal muscle and heart following systemic administration of the AAV9-ITG and AAV9LD-ITG libraries. Data are shown for AAV9 alone (**B**) or for all variants within each library (**C**), expressed as log<sub>2</sub> ratios of indicated tissues relative to liver. Whereas parental AAV9 shows reproducibly higher transgene expression in liver, consistent with its intrinsic liver tropism, variants within the AAV9LD-ITG library display a shifted distribution with higher transgene expression in skeletal muscle and heart compared with liver, and significantly higher muscle and cardiac expression than the AAV9-ITG library. This redistribution improved the identification of myotropic capsid variants. Data are presented as mean ± SEM. Statistical analyses were performed using one-way ANOVA followed by FDR correction. \*p < 0.05; \*\*p < 0.01; \*\*\*p < 0.001; \*\*\*\*p < 0.0001; ns not significant.

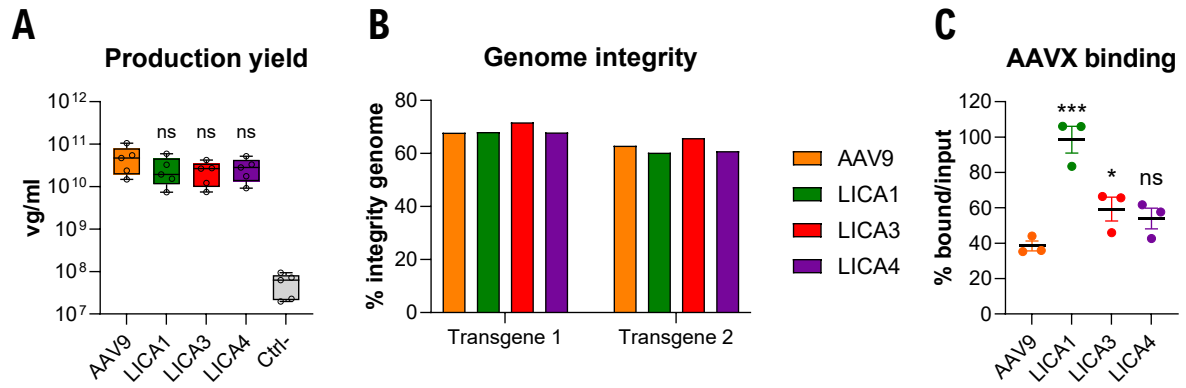

**Supplementary Figure 4: LICA3 and LICA4 exhibit improved manufacturability.** Vector manufacturability was evaluated by production yield (**A**, 5 biological replicates), integrity of packaged vector genomes assessed by droplet digital PCR using two independent transgenes (**B**), and capsid binding efficiency to AAVX affinity resin (**C**, 3 biological replicates). Data are presented as mean  $\pm$  SEM. Statistical analyses were performed using one-way ANOVA followed by FDR correction. \* $p < 0.05$ ; \*\* $p < 0.01$ ; \*\*\* $p < 0.001$ ; \*\*\*\* $p < 0.0001$ ; ns not significant.

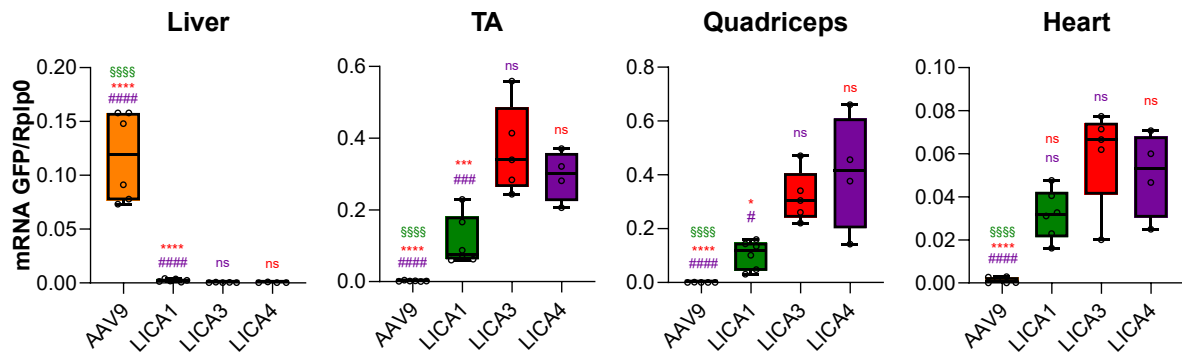

**Supplementary Figure 5: LICA3 and LICA4 showed improved transgene expression (mRNA level) in skeletal and cardiac muscles and strongly liver-detargeted at 3dpi, relative to AAV9 and LICA1.** Data are presented as mean  $\pm$  SEM. Statistical analyses were performed using one-way ANOVA followed by FDR correction. \* $p < 0.05$ ; \*\* $p < 0.01$ ; \*\*\* $p < 0.001$ ; \*\*\*\* $p < 0.0001$ ; ns not significant.

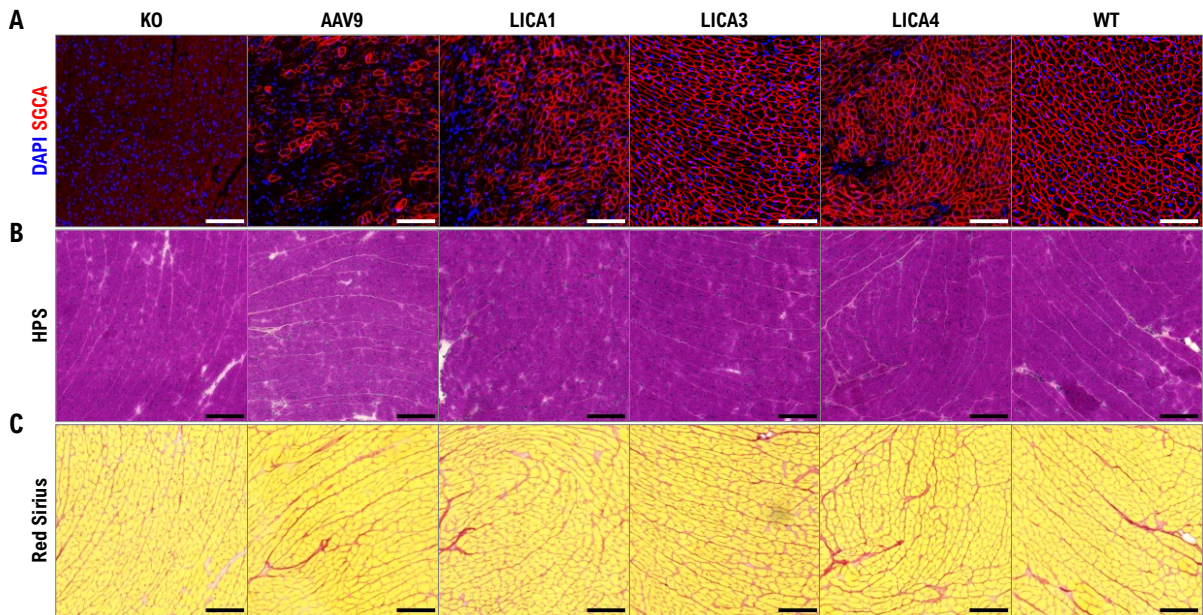

**Supplementary Figure 6: Cardiac transduction and histopathological evaluation following low-dose systemic gene therapy in an LGMDR3 mouse model.** Representative cardiac sections stained for SGCA (A), haematoxylin–phloxine–safron (HPS, B) and Sirius Red (C) following treatment with the indicated AAV capsids (Scale bar: 100µm). All three LICA variants demonstrate a significantly higher proportion of SGCA-positive cardiomyocytes compared with AAV9. At this dose, LICA3 and LICA4 achieve near-complete cardiomyocyte transduction. SGCA localization is restricted to sarcolemma, and no histopathological abnormalities or evidence of cardiac toxicity are observed.

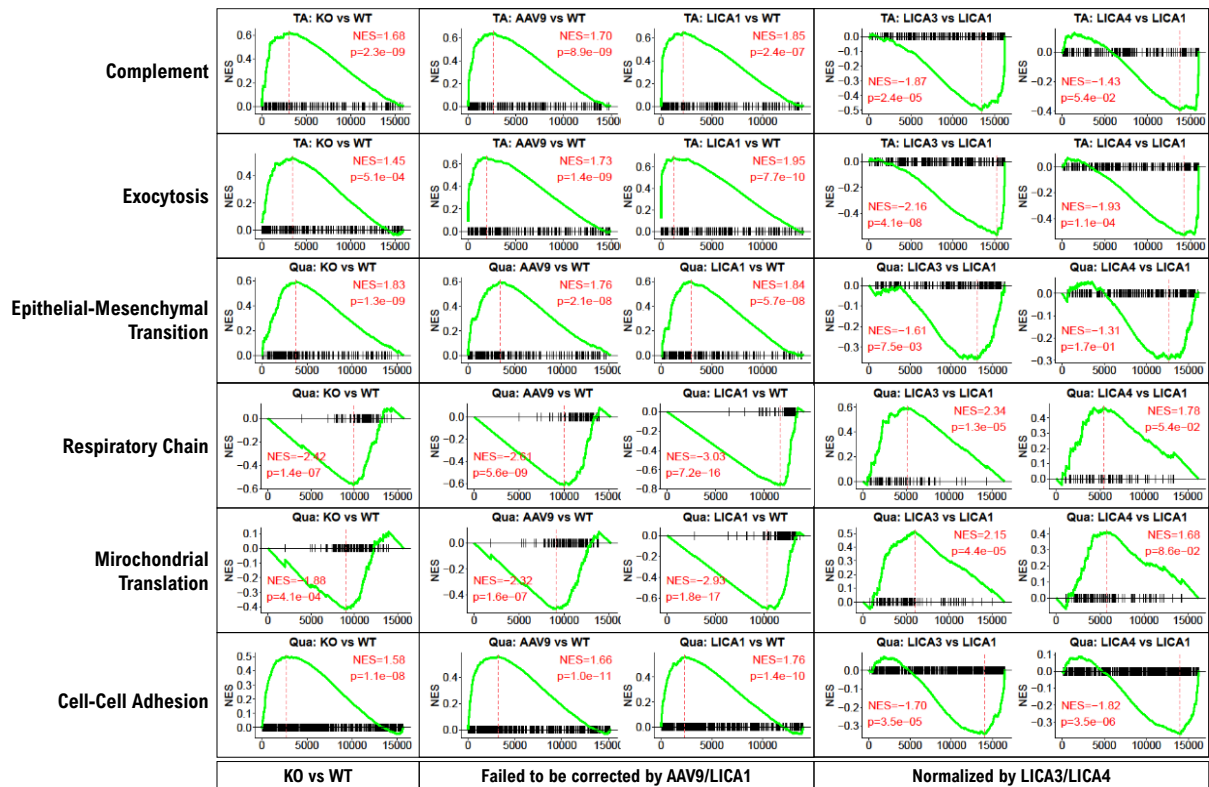

**Supplementary Figure 7: Transcriptomic normalization by LICA3 and/or LICA4.** Gene set enrichment analysis of pathways dysregulated in SGCA-KO muscle and insufficiently restored by AAV9 or LICA1 treatment but further normalized by LICA3 and/or LICA4.

## Supplementary Tables

**Table S1: Table of primers used in qPCR and ddPCR analysis.**

| Primer        | Forward (5'-3')         | Reverse (5'-3')           | Probe (if Taqman)             |
|---------------|-------------------------|---------------------------|-------------------------------|
| Rplp0         | CTCCAAGCAGATGCAGCAGA    | ATAGCCTTGCGCATCATGGT      | CCGTGGTGCTGATGGGCAAGAA        |
| ITR           | GGAACCCCTAGTGATGGAGTT   | CGGCCTCAGTGAGCGA          | CACTCCCTCTCTGCGCGCTCG         |
| SGCA          | TCTGGATGTCGGAGGTAGCC    | TGCTGGCCTATGTCATGTGC      | CGGGAGGGAAGGCTGAAGAGAGACC     |
| GFP           | AGTCCGCCCTGAGCAAAGA     | GCGGTCACGAACTCCAGC        | CAACGAGAAGCGCGATCACATGGTC     |
| CMV           | CATCAATGGGCGTGGATAGC    | GGAGTTGTTACGACATTTTGAAA   | ATTTCGAAGTCTCCACC             |
| bGH_pA        | TCTAGTTGCCAGCCATCTGTTGT | TGGGAGTGGCACCTTCCA        | TCCCCCGTGCCTTCTTGACC          |
| HBB2_pA       | CCAGGCGAGGAGAAACCA      | CTTGACTCCACTCAGTTCTCTTGCT | CTCGCCGTA AACATGGAAGGAACACTTC |
| mCherry-BC001 | TGGACATCACCTCCCACAAC    | GTATATACAACGAGTCTGTCTCG   |                               |
| mCherry-BC002 | TGGACATCACCTCCCACAAC    | GTGCGTTTAAATCTCTAGTCTCG   |                               |
| mCherry-BC003 | TGGACATCACCTCCCACAAC    | GTCCATCCGCTGTCCAG         |                               |
| mCherry-BC004 | TGGACATCACCTCCCACAAC    | TGACCCTGACCGCCAG          |                               |
| mCherry-BC005 | TGGACATCACCTCCCACAAC    | GTCTCGAAGGACGGAAG         |                               |
| mCherry-BC006 | TGGACATCACCTCCCACAAC    | TGGCCCGTCCGCTGAA          |                               |
| mCherry-BC007 | TGGACATCACCTCCCACAAC    | GGTACTGTAAGAGCGGACTGAC    |                               |
| mCherry-BC008 | TGGACATCACCTCCCACAAC    | GTGACCAGGATCTTAAGTCTCG    |                               |
| mCherry-BC009 | TGGACATCACCTCCCACAAC    | GTCGTTGCCCATGTTGAGT       |                               |
| mCherry-BC010 | TGGACATCACCTCCCACAAC    | GTTGGGCGTCGATCAAGG        |                               |
| mCherry-BC011 | TGGACATCACCTCCCACAAC    | GTAGATTGAATAGCGTAGTCTCG   |                               |
| mCherry-BC012 | TGGACATCACCTCCCACAAC    | GTATCCGCCAGAAGCAGC        |                               |
| mCherry-BC013 | TGGACATCACCTCCCACAAC    | TGGCGACCGACAGCCG          |                               |
| mCherry-BC014 | TGGACATCACCTCCCACAAC    | GTTCAGTAACGTACGATGTCTCG   |                               |
| mCherry-BC015 | TGGACATCACCTCCCACAAC    | GTCTATGCTTTCGAATCGTCTCG   |                               |
| mCherry-BC016 | TGGACATCACCTCCCACAAC    | GTTCCGGACCCGATACG         |                               |
| mCherry-BC017 | TGGACATCACCTCCCACAAC    | GTCCACAAACCAACCAGTC       |                               |
| mCherry-BC018 | TGGACATCACCTCCCACAAC    | GTGTACCGTTACAACGAGTCTC    |                               |
| mCherry-BC019 | TGGACATCACCTCCCACAAC    | GTGGCAACCAACGTTAGT        |                               |
| mCherry-BC020 | TGGACATCACCTCCCACAAC    | GTGCCCTTCTAGTGGTCTCG      |                               |
| mCherry-BC021 | TGGACATCACCTCCCACAAC    | GTCTCCTCGACTTCTGG         |                               |
| mCherry-BC022 | TGGACATCACCTCCCACAAC    | TAGGAACTCGTCGGCTGT        |                               |
| mCherry-BC023 | TGGACATCACCTCCCACAAC    | GTGAGCTGACACCAGATGTC      |                               |
| mCherry-BC024 | TGGACATCACCTCCCACAAC    | TCGTACCGCTGTTGAGGTC       |                               |
| mCherry-BC025 | TGGACATCACCTCCCACAAC    | TGCATGGTGGTAGTCTGTCT      |                               |
| mCherry-BC026 | TGGACATCACCTCCCACAAC    | TGTACTGCAATTGGCGTC        |                               |
| mCherry-BC027 | TGGACATCACCTCCCACAAC    | TCCTCAGTGCACCTCTGTC       |                               |
| mCherry-BC028 | TGGACATCACCTCCCACAAC    | GTGGCAGTGTTCTGTTGTC       |                               |
| mCherry-BC029 | TGGACATCACCTCCCACAAC    | GTGCGAGAGTCTCTAGGTC       |                               |
| mCherry-BC030 | TGGACATCACCTCCCACAAC    | GTGTA CTGGATAAGTGTCTC     |                               |
| mCherry-BC031 | TGGACATCACCTCCCACAAC    | GTCTACTCAGCGACATTGTCTC    |                               |
| mCherry-BC032 | TGGACATCACCTCCCACAAC    | GTAGAGCTAGAGTCAAGGTCTCG   |                               |
